# Supplementary material
Source: MDPI journal article supplement (https://www.mdpi.com/2073-4395/13/3/891)
Supplement: s1 [file s1]

Archive with 2 entries (2 files):
- agronomy-2185350-figure s1.pdf
- agronomy-2185350-supplementary.pdf
