# Supplementary material
Source: MDPI journal article supplement (https://www.mdpi.com/2073-4395/13/3/891)
Supplement: s1 [file s1 › agronomy-2185350-figure s1.pdf]

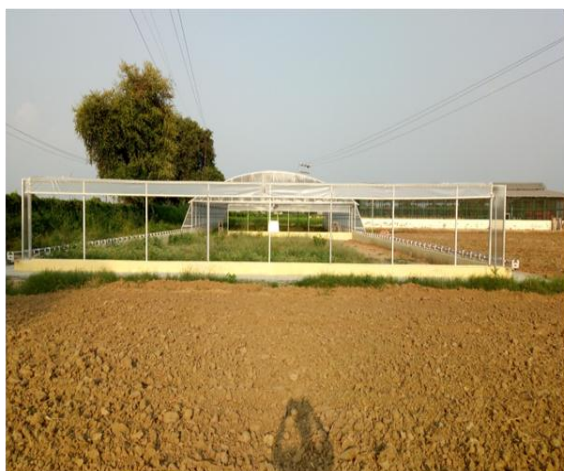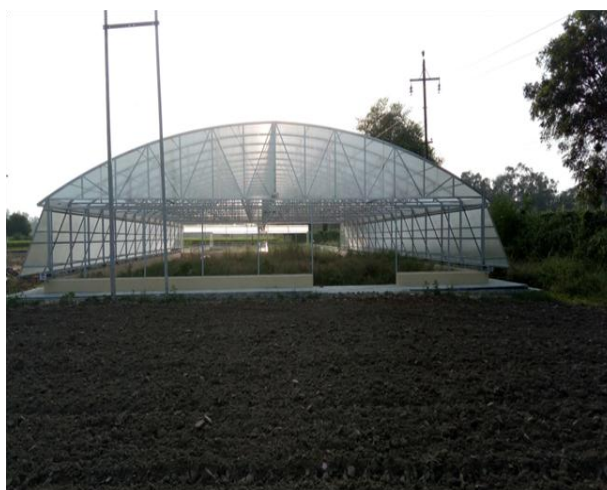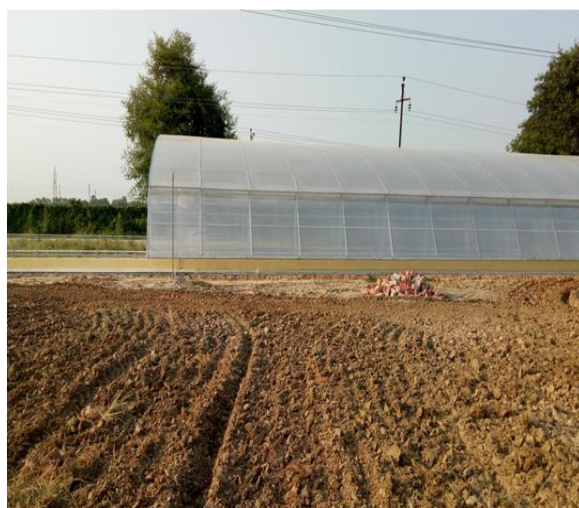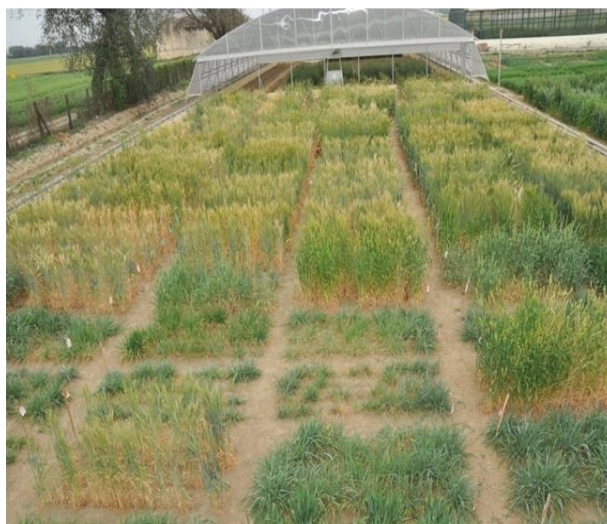

**Supplementary Figure S1: Rainout shelter where TSIR-DR (drought stress) and LSRF-DHT (combined drought and heat stress) trials were conducted at ICAR-IIWBR, Karnal.**
