# Supplementary material
Source: MDPI journal article supplement (https://www.mdpi.com/2073-4395/13/3/891)
Supplement: s1 [file s1 › agronomy-2185350-supplementary.pdf]

**Table S1 Pedigree details and target agro-climatic conditions of the genotypes used in study**

| G No | Genotype    | Pedigree                                                                                        | Target Conditions |
|------|-------------|-------------------------------------------------------------------------------------------------|-------------------|
| G 01 | AKAW3717    | HW2035/NI5439                                                                                   | Drought           |
| G 02 | AKW2862-1   | VEE#6//DOVE"S"/BUC"S"CM92225-66Y-OM                                                             | Heat              |
| G 03 | C 306       | RGN/CSK3//2*C591/3/C217/N14//C281                                                               | TSRF NWPZ, NEPZ   |
| G 04 | CNM 16-1    | Mutus*2/HARIL#1                                                                                 | IR CZ, PZ         |
| G 05 | DBW 168     | SUNSU/CHIBIA                                                                                    | TSIR PZ           |
| G 06 | DHTW 60     | Indigenous collection IC356761A                                                                 | Drought           |
| G 07 | DWAP 1607   | Advanced Breeding Line                                                                          | Late sown (Heat)  |
| G 08 | DWAP 1608   | Advanced Breeding Line                                                                          | Late sown (Heat)  |
| G 09 | DWAP 1610   | Advanced Breeding Line                                                                          | Late sown (Heat)  |
| G 10 | DWAP 1612   | Advanced Breeding Line                                                                          | Late sown (Heat)  |
| G 11 | DWAP 1613   | Advanced Breeding Line                                                                          | IR CZ, PZ         |
| G 12 | DWAP 1614   | Advanced Breeding Line                                                                          | IR CZ, PZ         |
| G 13 | HD 3043     | PJN/BOW//OPATA*2/3/CROC_1Ae.squarrosa 224)//OPATA                                               | RI NWPZ           |
| G 14 | HINDI 62    | Land race from UP (IC296681)                                                                    | Heat & Drought    |
| G 15 | HTW11       | Indigenous collection IC35117                                                                   | Heat              |
| G 16 | HTW 14      | RAJ3765/P11632//4*PBW343/3/PBW698                                                               | Heat              |
| G 17 | HTW6        | Indigenous collection IC29007A                                                                  | Heat              |
| G 18 | HTW 64      | HD2733/2*C306                                                                                   | Drought           |
| G 19 | HTW 65      | K7903/P11632                                                                                    | Heat              |
| G 20 | HTW 66      | SYN36/PBW396//2*PBW343                                                                          | Heat              |
| G 21 | HTW 67      | RAJ3765/P11632//3*PBW343                                                                        | Heat              |
| G 22 | LBP 2016-5  | NI5439/MACS2496                                                                                 | IR CZ, PZ         |
| G 23 | LBP 2016-9  | NP846/HUW234                                                                                    | Late sown (Heat)  |
| G 24 | NIAW 1415   | GW9506/PRL//PRL                                                                                 | RF/RI PZ          |
| G 25 | PBS 2       | SYN44/DBW14*2//FLW01                                                                            | Late sown (Heat)  |
| G 26 | QBP 1605    | 30 <sup>th</sup> SAWSN3009                                                                      | IR CZ, PZ         |
| G 27 | QBP 1606    | 36 <sup>th</sup> IBWSN172/AHW-5//PBW343/27 <sup>th</sup> IBWSN 168                              | IR CZ, PZ         |
| G 28 | QBP 1608    | 39 <sup>th</sup> IBWSN1110/36 <sup>th</sup> IBWSN162//HI1539                                    | Late sown (Heat)  |
| G 29 | RWP 2016-10 | BAJ#1*2/KISKADEE#1                                                                              | Late sown (Heat)  |
| G 30 | RWP 2016-15 | Francolin#1*2//ND643/2*WBLL1                                                                    | IR CZ, PZ         |
| G 31 | RWP 2016-16 | Sr39/DPW621-50                                                                                  | IR CZ, PZ         |
| G 32 | RWP 2016-17 | VEE/MJI//2*TUI/3/PASTOR/4/BERKUT/5/MUU                                                          | Late sown (Heat)  |
| G 33 | RWP 2016-18 | BABAX/Lr42//BABAX*2/3/PAVON753+Lr47/4/ND643/2*WBLL2                                             | IR CZ, PZ         |
| G 34 | SRIL 1      | DPW621-50/Dharwar Dry                                                                           | Drought           |
| G 35 | SRIL 116    | DPW621-50/Dharwar Dry                                                                           | Drought           |
| G 36 | ST 1A       | SYN99/OP2425/FLW22//PBW502                                                                      | Late sown (Heat)  |
| G 37 | UAS 304     | SERI/CEP80120//KAUZ/PBW343                                                                      | TSIR PZ           |
| G 38 | WB 2        | <i>T. DICOCCON CI9309/AE.SQUARROSA (409)/3/ MILAN/ S87230// BAV92/4/ 2*MILAN/ S87320//BAV92</i> | TSIR NWPZ         |
| G 39 | WH 730      | CPAN2092/IMPROVED LOK1                                                                          | Heat              |
| G 40 | WS 2016-12  | EC479379/K0711                                                                                  | IR CZ, PZ         |
| G 41 | WS 2016-4   | PASTOR/3/Altar84/Ae. Sq (Tr.Ta)//OPATA M-85                                                     | IR CZ, PZ         |
| G 42 | WS 2016-8   | AKAW4006/F81513/MILAN                                                                           | IR CZ, PZ         |

Table S2 ANOVA for agronomical traits under TSIR NS, TSRF DR and LSIR HT

| Source                  | DF  | DH         | DM          | GFD        | BM             | GY            | HI        | TGW        |
|-------------------------|-----|------------|-------------|------------|----------------|---------------|-----------|------------|
| Year (Y)                | 1   | 16156.63** | 32093.59**  | 7792.33**  | 130017189.99** | 18618692.58** | 4840.48** | 987.46**   |
| Centre ( C )            | 2   | 51374.40** | 21649.53**  | 27437.34** | 106599827.48** | 9513145.10**  | 4736.29** | 6490.97**  |
| Genotype (G)            | 41  | 607.42**   | 142.87**    | 146.56**   | 272807.09      | 35803.79*     | 172.62**  | 176.51**   |
| Sowing Condition (Cond) | 3   | 9880.70**  | 28336.96**  | 17990.25** | 52270927.57**  | 5498998.67**  | 1242.06** | 3846.65**  |
| Sowing time (S)         | 1   | 1745.75**  | 65293.51**  | 31679.28** | 1863575.98**   | 27287.63      | 182.24*   | 10759.33** |
| Irrigation (IR)         | 1   | 14892.20** | 11034.74**  | 356.73**   | 101418484.22** | 11594018.15** | 1007.23** | 572.39**   |
| G*Cond                  | 123 | 40         | 28.83       | 30.99      | 71383.24       | 12367.64      | 41.79**   | 19.21      |
| Y*G*Cond                | 164 | 9.44       | 27.96       | 27.75      | 70811.81       | 10151.5       | 42.23**   | 17.23      |
| G*S                     | 41  | 91.36**    | 36.05       | 66.09*     | 60964.71       | 11297.19      | 72.66**   | 31.38**    |
| G*IR                    | 41  | 15.62**    | 34.33       | 33.50      | 70040.49       | 13303.88      | 41.19     | 16.29      |
| G*S*IR                  | 41  | 14.25**    | 40.02       | 38.10      | 54935.27       | 7394.43       | 49.70     | 14.49      |
| C*G*S*IR                | 126 | 125.57**   | 60.42**     | 59.29*     | 242574.15**    | 9366.65       | 90.27**   | 52.92**    |
| TSIR-NS                 | 41  | 309.50**   | 90.66**     | 90.34*     | 205217.31**    | 21732.96**    | 62.75**   | 83.66**    |
| TSRF-DR                 | 41  | 402.57**   | 94.53**     | 105.75**   | 91719.22**     | 13175.27**    | 82.18     | 56.44**    |
| LSIR-HT                 | 41  | 90.624**   | 52.84       | 67.35      | 119932.22**    | 22708.99**    | 121.03**  | 61.94**    |
| LSRF-DHT                | 41  | 81.15**    | 60.25**     | 46.5       | 41014.53       | 6813.15*      | 76.36**   | 39.10**    |
| Source                  | DF  | PHT        | PTL         | SPKL       | SPKLT          | GN            | GW        |            |
| Year (Y)                | 1   | 49233.03** | 202526.91** | 117.71**   | 391.69**       | 16483.52**    | 76.30**   |            |
| Centre ( C )            | 2   | 76925.88** | 20169.43**  | 102.98**   | 740.75**       | 7964.74**     | 25.84**   |            |
| Genotype (G)            | 41  | 2717.29**  | 2575.54**   | 19.19**    | 37.70**        | 875.83**      | 0.97**    |            |
| Sowing Condition (Cond) | 3   | 23014.09** | 83208.65**  | 98.44**    | 570.86**       | 5867.68**     | 16.262**  |            |
| Sowing time (S)         | 1   | 2303.58**  | 46996.17**  | 5.03       | 89.03**        | 73.45         | 22.42**   |            |
| Irrigation (IR)         | 1   | 48124.75** | 130598.70** | 222.67**   | 1264.12**      | 15480.48**    | 26.97**   |            |
| G*Cond                  | 123 | 69.16**    | 314.72      | 3.2        | 4.61           | 66.17         | 0.16      |            |
| Y*G*Cond                | 164 | 49.63**    | 310.65      | 3.29       | 6.01           | 72.88         | 0.14      |            |
| G*S                     | 41  | 89.84**    | 331.91      | 2.78       | 4.66           | 73.19         | 0.18**    |            |
| G*IR                    | 41  | 69.84      | 333.35      | 2.77       | 5.59           | 99.94*        | 0.22**    |            |
| G*S*IR                  | 41  |            | 243.09      | 3.22       | 4.20           | 48.44         | 0.07      |            |
| C*G*S*IR                | 126 | 42.22      | 326.89      | 4.27       | 5.02           | 69.37         | 0.13      |            |
| TSIR-NS                 | 41  | 1014.49**  | 778.55**    | 6.69**     | 18.48**        | 402.98**      | 0.39**    |            |
| TSRF-DR                 | 41  | 664.62**   | 999.90**    | 15.48*     | 17.31**        | 240.24**      | 0.37**    |            |
| LSIR-HT                 | 41  | 964.59**   | 1212.79**   | 5.98**     | 14.39**        | 282.39**      | 0.25**    |            |
| LSRF-DHT                | 41  | 465.27**   | 532.53**    | 3.54**     | 5.50**         | 128.47**      | 0.19**    |            |

\*\*Significant at (P< 0.01) per cent LSD and \* significant at (P<0.05) per cent LSD

**Table S3** Mean performance of genotypes under different environments.

| TSIR-NS |                     |                   |       | TSRF-DR             |                  |       |
|---------|---------------------|-------------------|-------|---------------------|------------------|-------|
| Trait   | Mean $\pm$ SE       | Range             | CV%   | Mean $\pm$ SE       | Range            | CV%   |
| DH      | 78.47 $\pm$ 0.78    | 65.25 – 85.58     | 6.47  | 75.69 $\pm$ 0.44    | 66.92 – 80.58    | 3.81  |
| DM      | 128.31 $\pm$ 0.42   | 117.00 – 131.92   | 2.14  | 111.56 $\pm$ 0.28   | 104.83 – 114.17  | 1.62  |
| GFD     | 45.27 $\pm$ 0.42    | 37.67 – 52.58     | 6.06  | 35.38 $\pm$ 0.24    | 28.08 – 39.58    | 5.18  |
| PHT     | 95.85 $\pm$ 1.42    | 78.83 – 124.53    | 9.59  | 91.59 $\pm$ 1.39    | 76.94 – 113.39   | 9.86  |
| PTL     | 88.07 $\pm$ 1.24    | 70.29 – 104.00    | 9.15  | 80.80 $\pm$ 1.68    | 65.04 – 118.75   | 13.44 |
| BM      | 1539.84 $\pm$ 20.18 | 1280.67 – 1812.17 | 8.49  | 1211.41 $\pm$ 19.08 | 993.85 – 1459.58 | 10.20 |
| GY      | 522.01 $\pm$ 6.57   | 417.08 – 616.71   | 8.15  | 398.70 $\pm$ 8.13   | 302.42 – 535.69  | 13.22 |
| HI      | 35.56 $\pm$ 0.35    | 29.28 – 43.59     | 6.43  | 32.40 $\pm$ 0.43    | 26.53 – 41.17    | 8.64  |
| SPKL    | 10.06 $\pm$ 0.12    | 7.90 – 11.19      | 7.42  | 9.54 $\pm$ 0.11     | 7.79 – 11.17     | 7.54  |
| SPKLT   | 18.92 $\pm$ 0.19    | 16.22 – 22.64     | 6.56  | 18.05 $\pm$ 0.16    | 15.69 – 19.92    | 5.82  |
| GN      | 53.58 $\pm$ 0.89    | 40.77 – 62.57     | 10.82 | 49.25 $\pm$ 0.89    | 34.58 – 63.05    | 11.77 |
| GW      | 2.33 $\pm$ 0.03     | 1.64 – 2.83       | 9.47  | 1.81 $\pm$ 0.03     | 1.24 – 2.46      | 12.44 |
| TGW     | 42.62 $\pm$ 0.41    | 38.88 – 48.35     | 6.19  | 36.62 $\pm$ 0.42    | 32.22 – 43.76    | 7.49  |

  

| LSIR-HT |                     |                  |       | LSRF-DHT           |                  |       |
|---------|---------------------|------------------|-------|--------------------|------------------|-------|
| Trait   | Mean $\pm$ SE       | Range            | CV%   | Mean $\pm$ SE      | Range            | CV%   |
| DH      | 72.06 $\pm$ 0.42    | 65.50 – 76.58    | 3.81  | 68.01 $\pm$ 0.90   | 54.25 – 79.50    | 8.53  |
| DM      | 111.60 $\pm$ 0.32   | 103.92 – 115.00  | 1.88  | 109.46 $\pm$ 0.43  | 103.33 – 127.75  | 2.35  |
| GFD     | 37.19 $\pm$ 0.37    | 29.00 – 41.25    | 6.37  | 30.47 $\pm$ 0.46   | 28.00 – 41.83    | 6.54  |
| PHT     | 94.36 $\pm$ 1.38    | 79.67 – 118.36   | 9.50  | 80.81 $\pm$ 1.18   | 63.50 – 103.75   | 9.45  |
| PTL     | 85.94 $\pm$ 1.55    | 76.00 – 117.42   | 10.70 | 64.14 $\pm$ 1.41   | 52.46 – 98.08    | 14.27 |
| BM      | 1194.22 $\pm$ 15.43 | 992.29 – 1396.46 | 8.37  | 748.75 $\pm$ 13.85 | 560.79 – 1067.08 | 11.99 |
| GY      | 434.29 $\pm$ 6.71   | 335.08 – 526.08  | 10.02 | 268.37 $\pm$ 5.28  | 202.48 – 344.23  | 12.76 |
| HI      | 36.94 $\pm$ 0.49    | 29.70 – 44.86    | 8.60  | 34.63 $\pm$ 0.41   | 28.04 – 39.50    | 7.73  |
| SPKL    | 9.63 $\pm$ 0.11     | 7.42 – 11.02     | 7.34  | 8.98 $\pm$ 0.18    | 6.69 – 14.68     | 12.75 |
| SPKLT   | 18.96 $\pm$ 0.17    | 16.47 – 21.03    | 5.78  | 16.67 $\pm$ 0.19   | 13.06 – 18.81    | 7.31  |
| GN      | 51.41 $\pm$ 0.75    | 42.43 – 63.08    | 9.45  | 45.51 $\pm$ 0.70   | 33.53 – 55.20    | 9.90  |
| GW      | 1.97 $\pm$ 0.03     | 1.64 – 2.42      | 8.38  | 1.54 $\pm$ 0.03    | 1.41 – 2.31      | 10.56 |
| TGW     | 36.99 $\pm$ 0.35    | 33.00 – 41.96    | 6.12  | 31.22 $\pm$ 0.34   | 37.38 – 46.12    | 5.29  |
